# Supplementary material for: Aspergillus fumigatus calcium-responsive transcription factors regulate cell wall architecture promoting stress tolerance, virulence and caspofungin resistance
Source: PubMed Central journal article supplement (PMC6948819; doi:10.1371/journal.pgen.1008551), 2019-12-30
Supplement: pgen.1008551.s003.pdf [file pgen.1008551.s003.pdf]

**A.**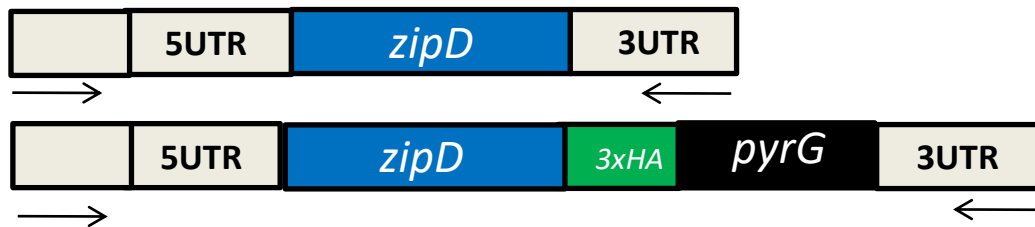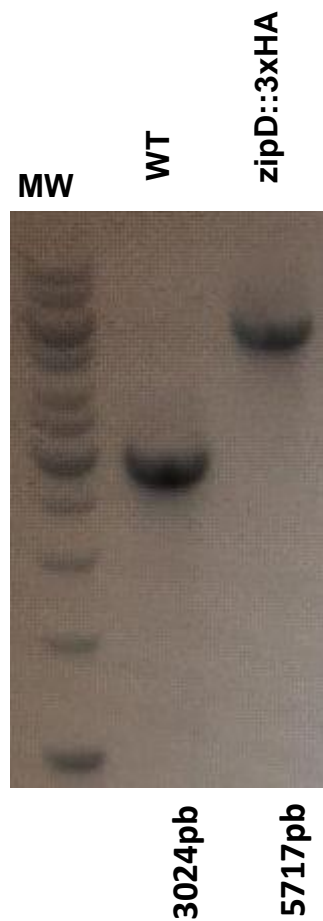**B.**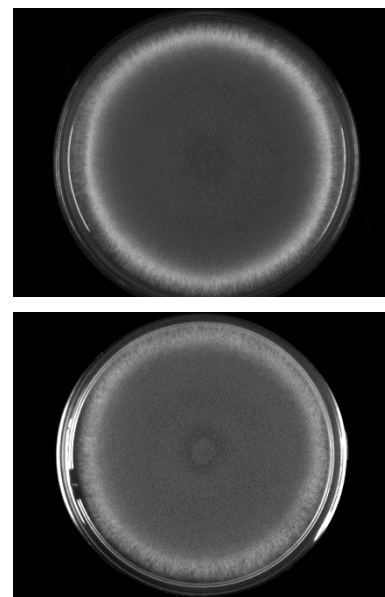

Wild type

*zipD::3xHA*Primer forward: *zipD* 5fw extPrimer reverse: *zipD* pRS426 3rv

Supplementary Figure S3- PCR scheme to check the ZipD::3xHA strain. (B) Phenotype analysis of wild type and ZipD::3xHA strains which were grown in MM plates for 5 days at 37°C
